## Assessment of the bovine uterus with endometritis using Doppler ultrasound

Bruno Leonardo Mendonça Ribeiro<sup>a</sup>; Enoch Brandão de Souza Meira Júnior<sup>a</sup>; Mario Augusto Aleman Reyes<sup>a</sup>; Eduardo Carvalho Marques<sup>a</sup>; Alessandra Figueiredo de Castro Nassar<sup>b</sup>; Lilian Gregory<sup>a</sup>.

<sup>a</sup> Departamento de Clínica Médica, Faculdade de Medicina Veterinária e Zootecnia, Universidade de São Paulo. Av. Prof. Orlando Marques de Paiva, 87, Cidade Universitária, São Paulo, Brazil, CEP 05508-270. lgregory@usp.br

<sup>b</sup> Laboratório de Bacteriologia Geral. Instituto Biológico. Av. Conselheiro Rodrigues Alves, 1252, Vila Mariana, São Paulo, Brazil, CEP: 04014-002.

### ABSTRACT

Postpartum uterine diseases such as metritis and endometritis are highly prevalent in dairy cows. These diseases negatively affect the reproductive performance and consequently economic activity. Cows in the puerperal period presenting endometritis may have alterations in the hemodynamics of the uterine tissue and the uterine arteries, which differ them from healthy cows. Therefore, this study aimed to use the Doppler ultrasonography to describe the hemodynamic changes in the uterus of cows showing endometritis diagnosed between 25 - 35 days postpartum. Eighty-nine Holstein Friesian females with 25 to 35 days postpartum were studied. Cows were assigned to two experimental groups, infected or not infected, according to the results of the endometrial cytology. Clinical examination, vaginoscopy, Doppler ultrasound and sample collection (saline solution was injected and recovered by endoscopic method aiming cytological and microbiological evaluation of the uterus) were also performed. Cows with endometritis had the cervix ( $P = 0.040$ ) and the left horn ( $P = 0.020$ ) increased compared to healthy cows. 78.6% of the endometritic cows showed abnormal uterine discharge, while 57.6% of healthy cows had this same condition ( $P = 0.0005$ ). The spectral Doppler evaluation of the uterine arteries revealed no differences between groups. *Bacillus spp.*,

28 *Trueperella pyogenes*, *Escherichia coli* and *Staphylococcus intermedius* were the most isolated  
29 bacteria among samples. Higher score or increase of uterus vascularization of the endometrial  
30 Doppler was correlated with *Trueperella pyogenes* ( $P = 0.0003$ ) and intrauterine heterogeneous  
31 content ( $P = 0.0047$ ). Finally, mesometrial Doppler was correlated with endometrial Doppler ( $P <$   
32  $0.001$ ), uterine bacteria ( $P = 0.001$ ) and intrauterine heterogeneous content ( $P = 0.049$ ). Regarding  
33 the evolution of uterine alterations, Doppler ultrasonography provides fast results and is a lesser  
34 invasive technique such as uterus biopsie and endometrial cytology and gives answers about fertility  
35 and uterus health.

36 Keywords: Endometritis, clinical reproduction, infertility

37

## 38 1.INTRODUCTION

39 High milk production causes high negative energy balance and could cause changes in  
40 hormone levels, embryonic losses and a higher incidence of reproductive disorders in dairy cows  
41 [1,2]. Unsatisfactory reproductive performance negatively affects productivity [3], decreasing milk  
42 production and number of calves [4].

43 The uterine infection, like metritis and endometritis is the most important cause of infertility  
44 in dairy cows. Therefore causing decrease in reproductive performance with economic injuries [5,6].  
45 Metritis is defined as a severe alteration of all layers of the uterus. In the clinical uterine examination  
46 the infected has reddish-brown fetid uterine discharge and systemic clinical signs such as fever and  
47 reduced milk production, normally within 21 days postpartum [7]. In contrast endometritis occurs  
48 after 21 days postpartum and is the inflammation of the endometrium. Animals show no systemic  
49 clinical signs [8]. Cytological endometritis may also occur, with absence of purulent discharge but  
50 high number of neutrophils on the endometrial cytological slide[8].

51 By showing the presence, direction and type of blood flow the Doppler ultrasonography  
52 technique determines hemodynamics changes wich are important to understand the  
53 morphophysiological aspects of the female reproductive tract [9]. This concept is used in women

54 gynecology to tell a part fertile [10] and infertile women [11]. Doppler ultrasound shows up the  
55 changes in the uterine circulation and it is used widely in veterinary reproduction [12,13].

56 It is hypothesized that alterations in the hemodynamics of the uterus tissue and arteries may  
57 happened in cows presenting endometritis in the puerperal. Thus, the use of more than one diagnostic  
58 technique may help in the identification of uterine diseases. Therefore, this study aimed to use the  
59 Doppler ultrasonography to describe the hemodynamic changes in the uterus of cows showing  
60 endometritis diagnosed between 25 - 35 days postpartum.

61

## 62 **2.MATERIALS AND METHODS**

63

### 64 *2.1 Area characterization and case definition*

65 This study was carried out in dairy farms from the State of São Paulo (N = 2) and from the  
66 State of Minas Gerais (N=1), Brazil, under the strict regulations of CONCEA (Brazilian committee  
67 for Animal use in experiments, protocol number 5135030214 and approved 27/08/2014 at CEUA,  
68 committee for animal use in experiments at the Veterinary School in the University of São Paulo),  
69 equivalent to EU Directive 2010/63/EU for animal experiments. All farms have freestall breeding  
70 system and assisted calving. Eighty-nine Holstein Friesian females with 25 to 35 days postpartum  
71 were studied. Cows were assigned to two experimental groups according to the results of the  
72 endometrial cytology [14] as follows:

73 a) Control group (C): healthy cows (neutrophil polymorphonuclear count < 10%).

74 b) Endometritis group (E): cows diagnosed by cytology (neutrophil polymorphonuclear  
75 count  $\geq 10\%$ ).

76 Clinical examination, vaginoscopy, Doppler ultrasound and sample collection were also  
77 performed, all in the same day.

78

79 *2.2 Clinical examination*

80 Female genital tract was evaluated by rectal palpation as proposed by Grunert, Birgel and Vale  
81 (2005) [15]. Briefly, ovaries were evaluated searching for follicles and corpus luteum (CL). In the  
82 cervix, morphological alterations such as volume was evaluated. In the uterus, location, size,  
83 symmetry of the horns and consistency were also investigated. Changes were described according to  
84 Grunert, Birgel and Vale (2005) [15] using the classification: from I (not very thick) to VI (very  
85 bulky). The horns were classified as symmetrical (s) and asymmetrical (As). According to consistency  
86 (C), the uterus was classified as flaccid (CI), reactive (CII), and with vigorous and prolonged  
87 contraction (CIII).

88

89 *2.3 Vaginoscopy*

90 Vaginoscopy was performed after rectal palpation. The speculum was introduced in the vagina  
91 to observe the vaginal mucosa, cervix and the presence of discharge according to Grunert, Birgel and  
92 Vale (2005) [15].

93

94 *2.4 Ultrasonography and Doppler mode*

95 The ultrasound was performed with a m-turbo, Fuji film Sonosite (Bothel, WA, USA) with a  
96 micro convex probe (8-5 mhz), as proposed by Meira Jr et al. (2012) [16] and Heppelmann, Krüger  
97 and Leidl (2013)[17]. Diameters of the cervix and horns, ovarian structures and the presence of  
98 uterine discharge were evaluated. Cervical and uterine diameters were classified as small or negative  
99 (< 3.5 cm), medium or suspect (between 3.5 and 5 cm) and large or positive (> 5 cm) (Figure 1).  
100 Uterine dimensions were evaluated according to Meira Jr et al. 2012 [16] (Figure 1). The presence of  
101 heterogeneous intrauterine contents (hic) and the uterine wall with hyperechoic characteristics were  
102 associated with purulent discharge according to Descoteaux, Gnemmi and Colloton (2010) [18]  
103 (Figure 2).

104 After the conventional ultrasonographic evaluation, hemodynamic patterns of the left and  
105 right uterine arteries were analyzed using the spectral Doppler mode [12]. Maximum flow velocity,  
106 pulsatility index and systole/diastole ratio were determined as described by Heppelmann, Krüger and  
107 Leidl (2013) [17] (Figure 3).

108 Color Doppler mode was used to evaluate the hemodynamic pattern of the uterine tissue in  
109 the intercornual ligament. The colorimetric scale for reproductive patterns [19] was used to establish  
110 a parallel with the inflammatory process. The procedures involved a subjective evaluation of the  
111 endometrial vascularization (0 - without vascularization to 2 - very vascularized) and the  
112 mesometrium (0 - without vascularization to 4 - extremely vascularized), as described by Ginther  
113 (2007) [19] (Figures 4 to 8).

114 The ovaries were evaluated for their size, consistency and structures (CL, follicles and cysts).  
115 Morphological characteristics of the ovaries were assessed to verify the presence of abnormalities  
116 such as cysts or tumors, to determine the existence of cyclic luteal ovarian activity and to estimate  
117 the probable phase of the cycle, factors that may affect animal's fertility [20]. Particularly, the  
118 vascularization of the CL was assessed by colorimetric Doppler mode, and it was classified as  
119 containing or not containing vascularization (Figure 9).

120

121

122

123

124

125

126

127

128

129 Figure 1: Ultrasound image in transverse section of the cervix (left) and uterine horns (right),  
130 using micro probe convex 8.5 Mhz. Measurement in centimeters of the diameter of cervix and uterine  
131 horns in bovine.

132

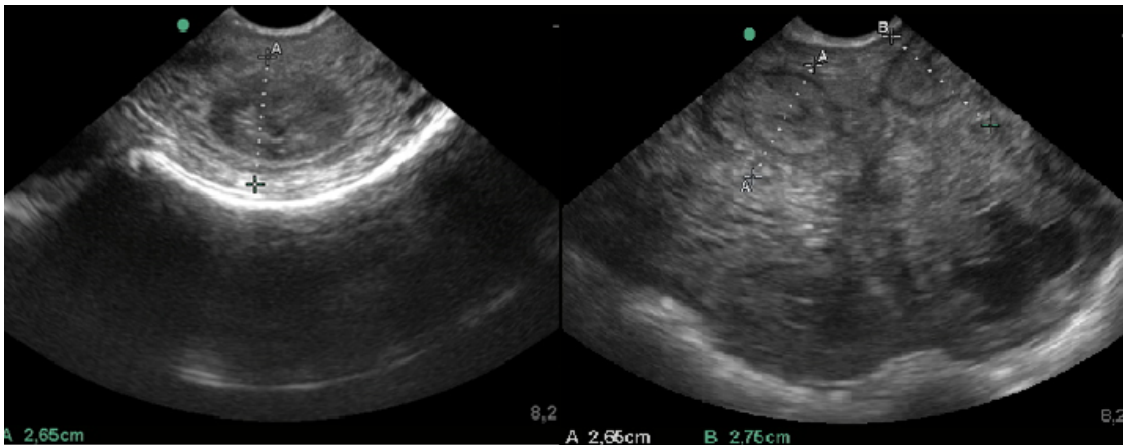

133

134

135

Source: (RIBEIRO, B.L.M. 2016) [21]

136 Figure 2 : Ultrasound imaging in transverse section of the uterus, using a microconvex 8.5  
137 Mhz probe, characterizing intrauterine contents in abnormal proportions; intrauterine-fluid (left) and  
138 hyperechoic intrauterine content.

139

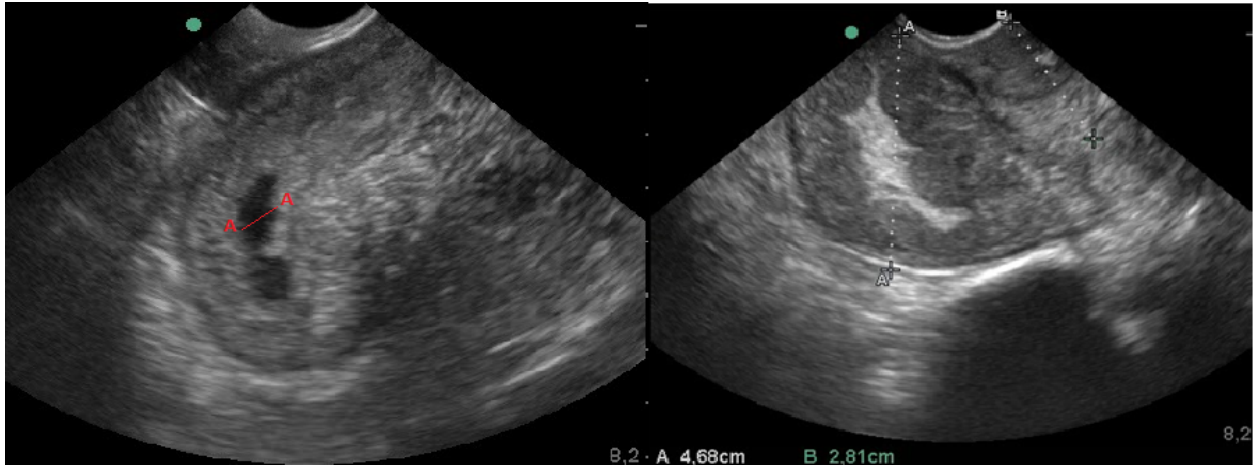

140

141 Source: (RIBEIRO, B.L.M. 2016) [21]

142

143

144

145

146

147

148

149

150

151 Figure 3: Ultrasound image in cross section of uterus, using 8.5 Mhz micro probe. Spectral  
152 Doppler of right left uterine arteries.

153

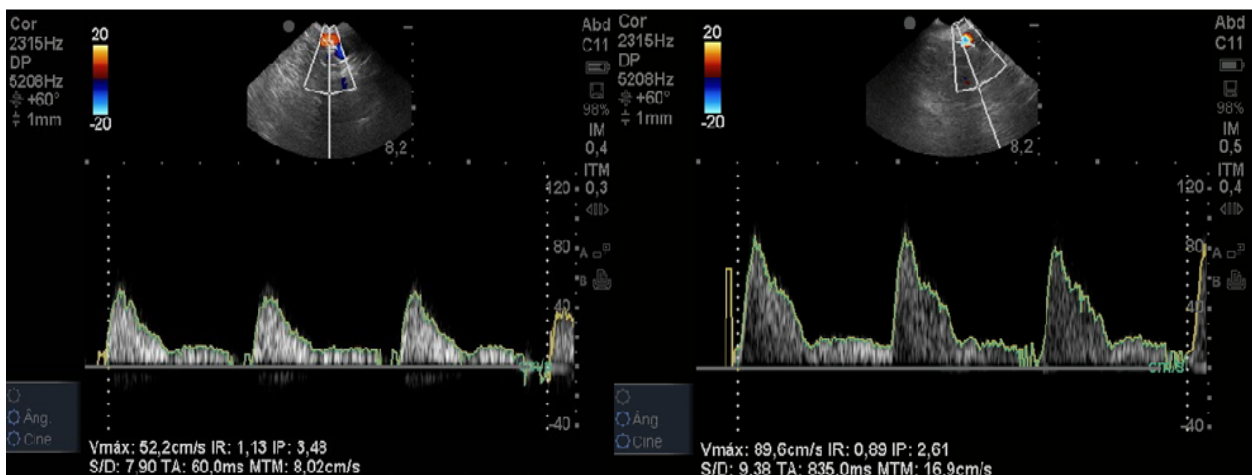

154

155 Source: (RIBEIRO, B.L.M. 2016) [21]

156

157

158

159

Figure 4: Characterization of 0 score for the subjective evaluation of the vascularization pattern of mesometrium (M) and 0 score for endometrium (e) by colorimetric evaluation technique in Doppler color mode.

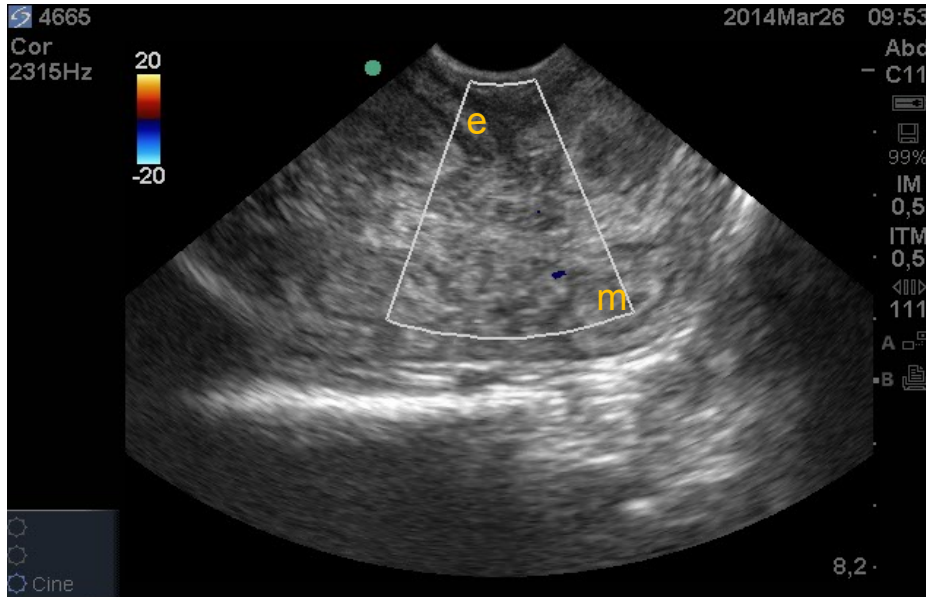

160

161

162

163

164

165

166

167

Source: (RIBEIRO, B.L.M. 2016) [21]

168

169

Figure 5: Characterization of a score 1 for the subjective evaluation of the vascularization pattern of mesometrium 0 by colorimetric evaluation technique in Doppler color mode.

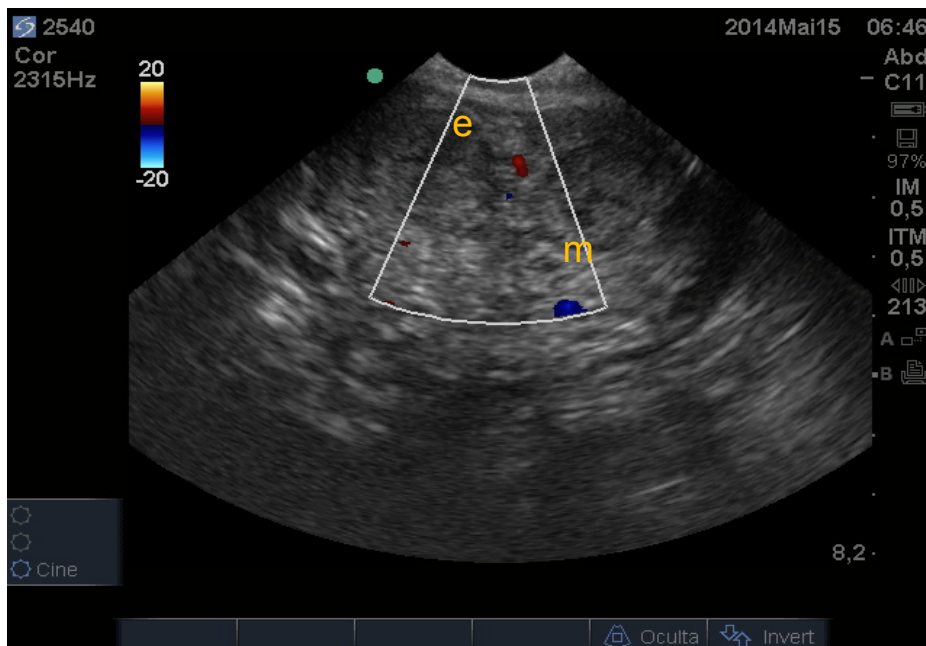

170



171 Source: (RIBEIRO, B.L.M. 2016) [21]

172

173 Figure 6: Characterization of score 2 for the subjective evaluation of the pattern of  
174 vascularization of the mesometrium and score 0 for endometrium by colorimetric evaluation in  
175 Doppler color mode.

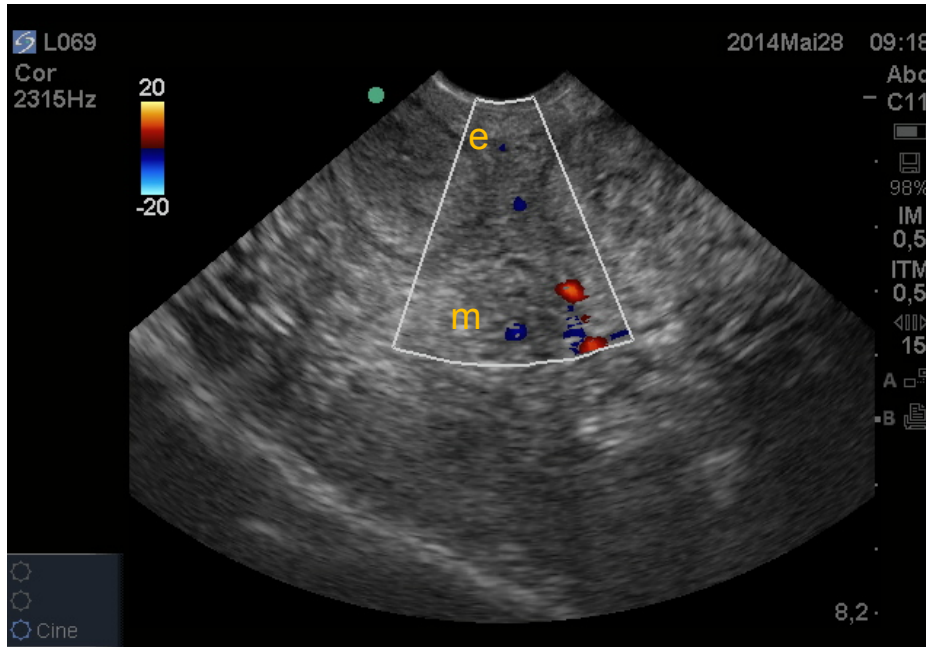

176

177 Source: (RIBEIRO, B.L.M. 2016) [21]

178

179 Figure 7: Characterization of score 3 for the subjective evaluation of the vascularization  
180 pattern of the mesometrium (m) and score 1 for endometrium (e) by colorimetric evaluation technique  
181 in color Doppler mode.

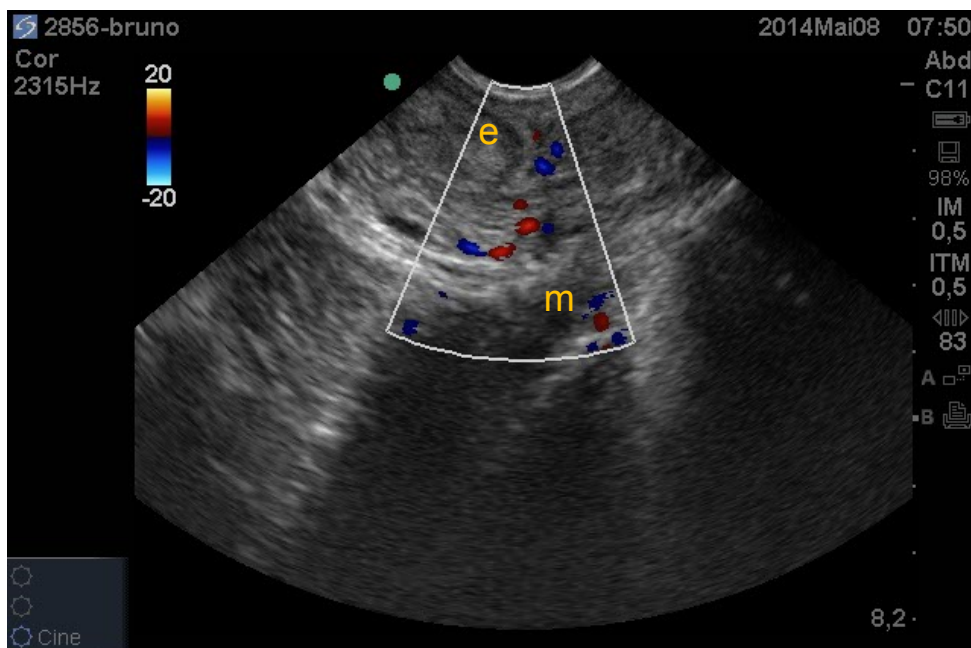

182

183 Source: (RIBEIRO, B.L.M. 2016) [21]

184

185

186

187

Figure 8: Characterization of the score 4 for the subjective evaluation of the vascularization pattern of the mesometrium (m) and score 2 for the endometrium (e) by colorimetric evaluation in Doppler color mode.

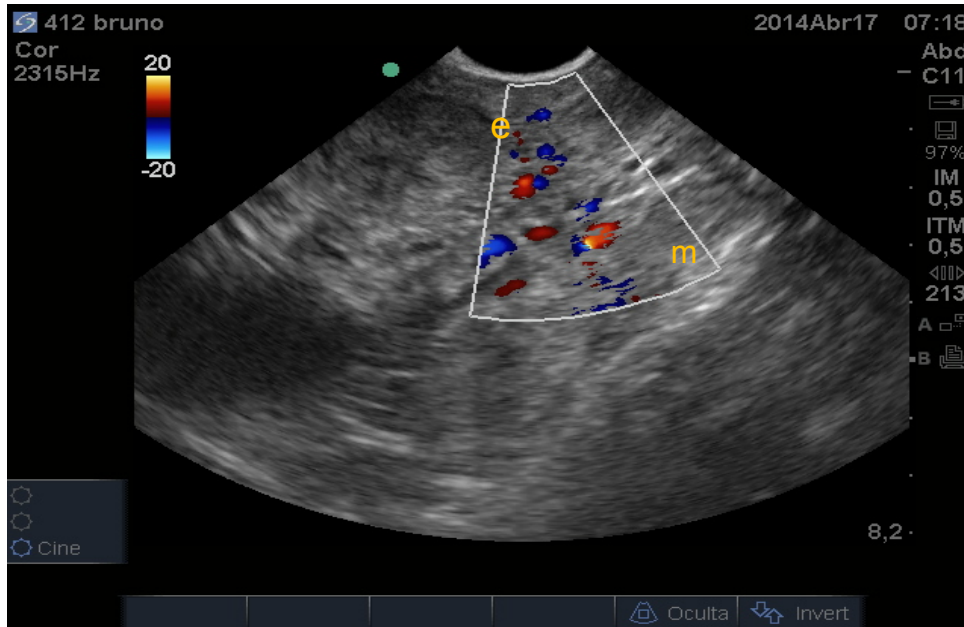

188

189

190

191

192

Source: (RIBEIRO, B.L.M. 2016) [21]

193

194

Figure 9: Ovarian evaluation with Doppler color mode: ovary with CL without vascularization (left); ovary with CL vascularized (right).

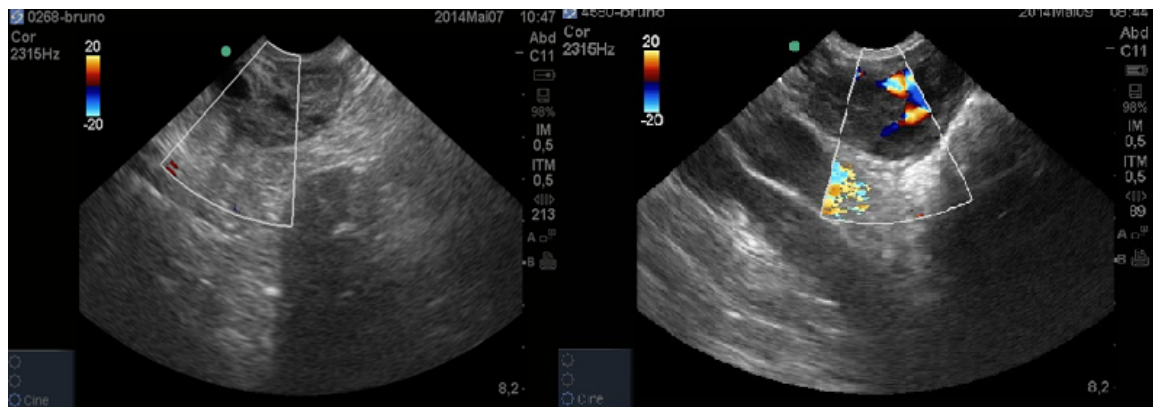

195

196

197

198

199

200

2.5 Hysteroscopy

201           The hysteroscopic examination was performed using a rigid endoscope (430 X 6 mm) with 2  
202 channels: one for the passage of 0.9% sterile saline for uterine lumen distension and another for  
203 cytological and microbiological samples collection. The optic part of the endoscope was introduced  
204 into the vagina, guided by transrectal palpation. Once inside the uterus, the sterile saline was infused  
205 to explore this anatomic site. The presence of mucopurulent or purulent inflammatory lesions in the  
206 mucosa were considered as signs of endometritis [22]. The images were classified as healthy or  
207 unhealthy (presence of pus, fibrin and hyperemia) mucosa. After exploration, a small portion of saline  
208 was recovered and used for macroscopic, cytological and microbiological evaluation of the uterus  
209 content. After each examination, the optic cable was washed with water only. The work channels  
210 were brushed with a flexible 75cm X 0.20mm brush immersed in enzymatic detergent (Hs-enzyme®,  
211 Strattner®) and, then, disinfected using paracetic acid (Peroxylyfe®), according to the manufacturer's  
212 instructions.

### 213    2.6 Uterine cytology

214           One hundred and fifty microliters of the recovered saline were transferred to a cytocentrifuge  
215 chamber and samples were fixed and centrifuged on a glass slide for microscopy at approximately  
216 550 rpm for 6 minutes [6]. The slides were stained using the Panotipo Rapido® kit, and cytology was  
217 performed by counting 100 cells, under magnification of 400x using an optical microscope. The  
218 percentage of neutrophil polymorphonuclear cells (% pnn) (Figure 12) was determined. Cows with  
219 %Ne > 10% were considered positive to the cytology test [23].

220

221 *2.7 Microbiological*

222 Five hundred microliters of the recovered saline were added to thioglycolate broth (Difco®)  
223 and kept at 2°-10 °C until processing at the Laboratory of General Bacteriology, Biological Institute,  
224 São Paulo. Ten microliters were plated in 5% sheep blood agar and incubated for 72 hours at 37 °C  
225 under microaerophilic conditions. Morphological characteristics of each colony and Gram staining  
226 were performed. Bacteria species were determined using biochemical tests according to Winn et al.  
227 (2008).

228 *2.8 Statistical analysis*

229 Error normality and homogeneity of variance were analyzed by Shapiro-Wilk Test and  
230 Bartlett Test, respectively. Non-normal data were analyzed using a non-parametric test (Kruskal-  
231 Wallis test) (proc npar1way). Differences between the groups (control and endometritis) were  
232 evaluated by ANOVA, reaffirmed by a t-test (JMP 12.0 - SAS). Same conditions (proc glimmix from  
233 SAS) were used for binary data ("subjective evaluation score of endometrial perfusion" and  
234 "subjective evaluation score of mesometrium perfusion"). Correlation between variables were  
235 performed using Spearmann correlation test for variables that did not present normal distribution  
236 (proc corr from SAS). A significance level of 5% was used for all tests. All tests were performed in  
237 SAS.

238

### 239 3. Results

240

241 One hundred cows were initially examined, but due to problems with the ultrasound device,  
242 eleven samples were lost. So, 89 cows were enrolled in this study, and they were divided accordingly  
243 to citology results into two groups: control group (E) (N= 33) and endometritis group (N = 56).

#### 244 3.1 Ultrasonographic exam

245 Cows with endometritis had the cervix ( $P = 0.040$ ) and the left horn ( $P = 0.020$ ) increased  
246 compared to healthy cows (Table 1). In the endometritis group, 78.6% of the cows showed abnormal  
247 uterine discharge, while in health group only 57.6% of the animals showed this same condition ( $P =$   
248  $0.0005$ ) (Table 2). Besides, intrauterine heterogeneous content were increased in sick cows (66.0%)  
249 compared to healthy cows (30.3%) ( $P = 0.0011$ ) (Table 3). Evaluation of endometrial and  
250 mesometrium vascularization by the colorimetric method revealed differences in the vascularization  
251 score (vc) of the endometrium between healthy (C) and endometritis group (C) ( $P < 0.05$ ) (Table 4  
252 and 5). During ovarian examination, presence or absence of CL were not different between group (C)  
253 and group (E) (Table 6). In addition, the absence of vascularized corpus luteum in the left ovary  
254 was increased in the endometritis group ( $P = 0.029$ ) (Table 7). The spectral Doppler evaluation of  
255 the uterine arteries revealed no differences between groups (Table 8).

256

257

258

Table 1 - Average diameter between measurements of linear ultrasonography of the cervix and uterine horns with Endometritis

| Uterine structures | Control     | Endometritis | P value |
|--------------------|-------------|--------------|---------|
| Cervical (cm)      | 3.55(±0,13) | 3.89(±0,01)  | 0.040   |
| Right horn (cm)    | 2.56(±0,11) | 2.77(±0,08)  | 0.100   |
| Left horn (cm)     | 2.48(±0,13) | 2.89(±0,10)  | 0.020   |

Source: (RIBEIRO, B.L.M., 2016).

259

260

261

262

Table 2- Presence of intrauterine fluid (IUF) in cows with and without Endometritis

|                 | Control<br>n (%) | Endometritis<br>n (%) | P value |
|-----------------|------------------|-----------------------|---------|
| Presence de IUF | (14/33) 42.42%   | (44/56) 78.57%        | 0,0005  |
| Absence de IUF  | (19/33) 57.58%   | (12/56) 21.43%        |         |

Source: (RIBEIRO, B.L.M., 2016).

263

264

265  
266  
267

Table 3 - Animals that presented intrauterine heterogeneous content (IUHC) in abnormal amounts throughout the experiment

|                  | Control<br>n (%) |        | Endometritis<br>n (%) |        | P value |
|------------------|------------------|--------|-----------------------|--------|---------|
| Presence de IUHC | (10/33)          | 30.30% | (37/56)               | 66.07% | 0,0011  |
| Absence de IUHC  | (23/33)          | 69.70% | (19/56)               | 33.93% |         |

Source: (RIBEIRO, B.L.M., 2016).

268  
269  
270

Table 4 - Evaluation of vascular pattern of endometrium

| EV- Doppler Endometrium | Control<br>n (%) |        | Endometritis<br>n (%) |        | P value |
|-------------------------|------------------|--------|-----------------------|--------|---------|
| 0                       | (31/33)          | 93.94% | (42/56)               | 75.00% | 0,0246  |
| 1+2                     | (2/33)           | 6.06%  | (14/56)               | 25.00% |         |

Source: (RIBEIRO, B.L.M., 2016).

Legend: 0 = non-vascularized; 1 = poorly vascularized; 2 = very vascularized

271  
272  
273  
274

Table 5- Frequency of evaluation of the vascular pattern of Mesometrium

| EV- Doppler Mesometrium | Control<br>n (%) |        | Endometritis<br>n (%) |        | P value |
|-------------------------|------------------|--------|-----------------------|--------|---------|
| 0                       | (10/33)          | 30.30% | (8/56)                | 14.29% | 0,0344  |
| 1                       | (11/33)          | 33.33% | (9/56)                | 16.07% |         |
| 2                       | (5/33)           | 15.15% | (14/56)               | 25.00% |         |
| 3                       | (5/33)           | 15.15% | (12/56)               | 21.43% |         |
| 4                       | (2/33)           | 6.06%  | (13/56)               | 23.21% |         |

Source: (RIBEIRO, B.L.M., 2016).

Legend: 0 = non-vascularized; 1 = poorly vascularized; 2 = vascularized; 3 = very vascularized; 4 = extremely vascularized.

275  
276  
277  
278  
279  
280

Table 6 - Frequency of Presence of CL as a function of Endometritis

|                      | Control<br>n (%) |        | Endometritis<br>n (%) |        | P value |
|----------------------|------------------|--------|-----------------------|--------|---------|
| Presence de CL Right | (15/33)          | 45.45% | (24/56)               | 42.86% | 0.811   |
| Absence de CL Right  | (18/33)          | 54.55% | (32/56)               | 57.14% |         |
| Presence de CL Left  | (16/33)          | 48.48% | (18/56)               | 32.14% | 0.125   |
| Absence de CL Left   | (17/33)          | 51.52% | (38/56)               | 67.86% |         |

Source: (RIBEIRO, B.L.M., 2016).

281  
282  
283

Table 7 - Presence of CLv as a function of Endometritis

|                       | Control<br>n (%) |        | Endometritis<br>n (%) |        | P value |
|-----------------------|------------------|--------|-----------------------|--------|---------|
| Presence de CLv Right | (12/33)          | 36.36% | (19/56)               | 33.93% | 0.815   |
| Absence de CLv Right  | (21/33)          | 63.64% | (37/56)               | 66.07% |         |
| Presence de CLv Left  | (15/33)          | 45.45% | (13/56)               | 23.21% | 0.029   |
| Absence de CLv Left   | (18/33)          | 54.55% | (43/56)               | 76.79% |         |

Source: (RIBEIRO, B.L.M., 2016).

284  
285  
286  
287

Table 8 - Spectral Doppler average in Uterine Arteries

| Doppler spectral | Control       |  | Endometritis  | P value |
|------------------|---------------|--|---------------|---------|
| Vmax-Right       | 88.47 (±5.33) |  | 93.84 (±4.14) | 0.428   |
| IR- Right        | 0.85 (±0.35)  |  | 0.84 (±0.02)  | 0.766   |
| IP-Right         | 2.57 (±0.20)  |  | 2.66 (±0.16)  | 0.744   |

|             |               |               |       |
|-------------|---------------|---------------|-------|
| S/D Right   | 22.16 (±6.39) | 12.63 (±4.96) | 0.242 |
| MTM-Right   | 20.01 (±2.35) | 21.84 (±1.83) | 0.541 |
| Flow- Right | 0.94(0.11)    | 1.02 (0.086)  | 0.540 |
| Vmax-Left   | 90.19 (±4.47) | 85.77 (±3.38) | 0.433 |
| IR- Left    | 0.80 (±0.03)  | 0.85 (±0.03)  | 0.217 |
| IP-Left     | 2.62 (±0.27)  | 2.70 (±0.20)  | 0.809 |
| S/D- Left   | 19.47 (±5.67) | 12.19 (±4.30) | 0.309 |
| MTM-Left    | 21.50 (±2.05) | 18.93 (±1.55) | 0.321 |
| Flow- Left  | 1.01(0.09)    | 0.89(0.07)    | 0.321 |

288 LEGEND: VMAX- MAXIMUM SPEED; IR- INDEX RESISTANCE; IP-INDEX PULSATILITY; S / D-  
 289 SYSTOLE AND DIATST; MTM- AVERAGE TIME  
 290  
 291  
 292  
 293  
 294

### 295 3.3 Microbiological findings

296 *Bacillus spp.*, *Trueperella pyogenes*, *Escherichia coli* and *Staphylococcus intermedius* were  
 297 the most isolated bacteria among samples. Yeast was also detected in 25% of samples (Table 9).  
 298

299 Table 9 Identification of the microorganisms in samples

|                          | Endometritis |        |
|--------------------------|--------------|--------|
|                          | n (%)        |        |
| Bacterium+Yeast          | (6/85)       | 7.06%  |
| Yeast                    | (21/85)      | 24.71% |
| Bacterium                | (38/85)      | 44.71% |
| <i>T. pyogenes</i>       | (10/85)      | 11.76% |
| <i>S. intermedius</i>    | (7/85)       | 8.24%  |
| <i>S.auerus</i>          | (1/85)       | 1.18%  |
| <i>Streptococcus</i> sp. | (1/85)       | 1.18%  |
| <i>Bacillus</i> sp.;     | (13/85)      | 15.29% |
| <i>E. coli</i>           | (7/85)       | 8.24%  |
| <i>Proteus</i> sp.       | (2/85)       | 3.53%  |

300 Source: (RIBEIRO, B.L.M., 2016).  
 301

### 302 303 3.4 Correlations with variables

304 A positive correlation between mixed culture (bacteria + yeasts) and endometritis was  
 305 observed ( $P = 0.0003$ ). In addition, weak correlations were observed between intrauterine  
 306 heterogeneous content ( $r = 0.34$ ), intrauterine fluid ( $r = 0.37$ ) and endometritis. The disease was also

307 correlated with Doppler ultrasonography ( $P = 0.0027$ ) and endometrial Doppler ( $P = 0.0383$ ). A weak  
308 and negative correlation with the presence of corpus luteum in the vascularized left ovary ( $P = 0.0359$ )  
309 and endometritis was also detected (Table 10).

310 Table 10 - Correlation between Endometritis and other  
311 variables

|                     | Endometritis<br>-1<r>1 | P value |
|---------------------|------------------------|---------|
| Bacterium+ Yeast    | 0.38                   | 0.0003  |
| IUHC                | 0.34                   | 0.0012  |
| IUF                 | 0.37                   | 0.0005  |
| Doppler Mesometrium | 0.32                   | 0.0027  |
| Eclv                | -0.23                  | 0.0359  |
| Doppler Endometrium | 0.22                   | 0.0383  |

312 Source: (RIBEIRO, B.L.M., 2016).

313 Legend: IUHC = intrauterine heterogeneous content;  
314 IUF = intrauterine fluid; eclv = left vascularized  
315 corpus luteum.

316

317 Intrauterine fluid (IUF) was correlated with *Trueperella pyogenes* ( $r = 0.27$ ), yeast ( $r = 0.25$ ),  
318 *Staphylococcus intermedius* ( $r = 0.23$ ), and *Escherichia coli* ( $r = 0.23$ ) ( $P < 0.05$ ) (Table 13). Strong  
319 correlations between intrauterine heterogeneous content (IUHC), and IUF ( $P = 0.0001$ ) and the  
320 presence of bacteria ( $P = 0.0001$ ) were detected. IUHC was also correlated with *Trueperella pyogenes*  
321 ( $r = 0.36$ ), *Escherichia coli* ( $r = 0.30$ ), *Bacillus spp.* ( $r = 0.25$ ), *Staphylococcus intermedius* ( $r = 0.22$ )  
322 and yeast ( $P < 0.05$ ) (Table 14). Endometrial Doppler was correlated with *Trueperella pyogenes* ( $P$   
323 = 0.0003) and IUHC ( $P = 0.0047$ ) (Table 15). Finally, mesometrial Doppler was correlated with  
324 endometrial Doppler ( $P < 0.001$ ), uterine bacteria ( $P = 0.001$ ) and IUHC ( $P = 0.049$ ). A negative  
325 correlation with the presence of yeast ( $P = 0.022$ ) was also observed (Table 16).

326

327

328

329

330

331



332  
333

Table 11 - Correlation between Presence of Intrauterine Fluid (IUF) compared to Presence of microorganisms

|                      | IUF<br>-1<r>1 | P value |
|----------------------|---------------|---------|
| Bacterium            | 0.52          | 0.0001  |
| <i>T.pyogenes</i>    | 0.27          | 0.0109  |
| Yeast                | 0.25          | 0.0215  |
| <i>S.intermedius</i> | 0.23          | 0.0344  |
| <i>E. coli</i>       | 0.23          | 0.0345  |

334

Source: (RIBEIRO, B.L.M., 2016).

335

Legend: *T. pyogenes*= *Trueperella pyogenes*; *S. intermedius*=

336

*Staphylococcus intermedius* *E. coli* = *Escherichia coli*

337

338

339

340

341

342

Table 12 - Correlation of animals with heterogeneous content compared to other variables

|                       | IUHC<br>-1<r>1 | P value |
|-----------------------|----------------|---------|
| IUF                   | 0.72           | 0.0001  |
| Bacterium             | 0.64           | 0.0001  |
| <i>T. pyogenes</i>    | 0.36           | 0.0007  |
| <i>E. coli</i>        | 0.3            | 0.0052  |
| Yeast                 | 0.27           | 0.0135  |
| <i>Bacillus</i> sp.   | 0.25           | 0.0223  |
| <i>S. intermedius</i> | 0.22           | 0.0434  |

343

Source: (RIBEIRO, B.L.M., 2016).

344

Legend: IUF = Intrauterine fluid; *T. pyogenes* = *Trueperella pyogenes*; *S. intermedius*=

345

*Staphylococcusintermedius*; *E.coli* = *Escherichia coli*.

346

347

348

Table 13 - Endometrium color Doppler correlation compared to other variables

|                    | Doppler Endometrium<br>-1<r>1 | P value |
|--------------------|-------------------------------|---------|
| <b>T. PYOGENES</b> | 0.38                          | 0.0003  |
| Bacterium          | 0.38                          | 0.0003  |
| IUHC               | 0.36                          | 0.0047  |

349

Source: (RIBEIRO, B.L.M., 2016).

350

Legend: IUHC = intrauterine heterogeneous content; *T. pyogenes* = *Trueperella pyogenes*.

351

352

353

354

Table 14 - Doppler color correlation of Mesometrium compared with other variables

|                        | Doppler<br>Mesometrium | P value |
|------------------------|------------------------|---------|
| Doppler<br>Endometrium | 0.52                   | 0.000   |
| Bacterium              | 0.35                   | 0.001   |
| Yeast                  | -0.25                  | 0.022   |
| IUHC                   | 0.21                   | 0.049   |

355

Source: (RIBEIRO, B.L.M., 2016).

356

Legend: IUHC = intrauterine heterogeneous content.

357

358

#### 359 4. Discussion

360

361 Endometritis is a uterine disease and is related to negative reproductive performance [8].

362 Besides physical examination, new diagnostic tools are important to improve the precocity in the

363 diagnosis of this disease [24].

364 Our results showed differences between the size of the cervix and a larger uterus in cows with

365 endometritis. After delivery, the uterus is greatly enlarged (approximately 8 to 10 kg). In general, the

366 uterine macroscopic involution occurs between 3 to 5 weeks postpartum, when the uterus should

367 weight approximately 0.9 kg and the diameter of the pre-gravid uterine horn should be less than 5

368 cm, total involution of the cervix occurs between 4 to 6 weeks postpartum [25]. A new pregnancy

369 depends on the anatomical and functional return of the genital tract to a state similar to that before

370 pregnancy [26]. In the present research, the increased left horn in animals with endometritis was

371 observed. This information is in agreement with other researches that proved that a uterine infection

372 provides a delayed involution [27, 26]. In this study, cows with endometritis presented larger cervix

373 diameter compared to healthy animals. LeBlanc et al. (2002) [5] highlighted that cows with clinical

374 endometritis showed cervical measurement  $\geq 7.5$  cm in diameter after 20 days postpartum and they

375 presented mucopurulent or purulent discharge detected by vaginoscopy after 26 days postpartum. Our

376 study highlights that endometritis was increased in cows showing abnormal intrauterine fluid

377 accumulation, and it was in agreement with several studies [28, 29, 16]. Intrauterine fluid was

378 correlated with *Trueperella pyogenes*, yeast, *Staphylococcus intermedius*, *Escherichia coli*, which

379 suggests that these agents cause inflammation of the uterine mucosa and proliferation of the

380 endometrial glands, leading to a greater accumulation of intrauterine fluid.

381 Endometritis was highly detected in cows showing intrauterine heterogeneous content (IHC).

382 Meira Jr. et al. (2012) [16] also described high correlation between IHC and the diagnosis of

383 endometritis. IHC was also associated with *Trueperella pyogenes*, *Escherichia coli*, *Bacillus spp.* and

384 *Staphylococcus intermedius*, and yeast, demonstrating that these microorganisms may cause genital

385 discharge [16].

386 The presence of vascularization in the endometrium (degrees 1 and 2) was increased in cows  
387 with endometritis, suggesting differences between healthy and unhealthy cows. The color Doppler  
388 mode provides colored images of the blood flow, allowing estimation of the tissue vascularization  
389 [34]. Ginther (2007) [19] proposed a model to evaluate the uterine hemodynamic associated with  
390 endometritis. This model was modified in the present research, and our results showed a few animals  
391 with alterations in the subjective evaluation score of endometrial vascularization, and a positive  
392 correlation with *Trueperella pyogenes*.

393 Ultrasonographic evaluation of the endometrium using color Doppler mode showed a positive  
394 correlation with endometritis. This information emphasizes the possible combination of this new  
395 noninvasive technique with the standard diagnostic methods to predict uterine disease. No difference  
396 was detected at data analysis of spectral Doppler mode. Herzog and Bollwein (2013) [2] reported  
397 increased pulsatility at 24 hours postpartum with a peak on the 28th day, decreasing progressively  
398 until 90th day. An inverse proportional relation was observed in blood flow, which already starts high  
399 in the postpartum and decreases until around the 28th day maintaining basal levels up to 90th day.  
400 Clinical and histologic uterine involution ranges from 21 to 50 postpartum, and this may differ from  
401 the recovery of hemodynamic patterns of the uterus that requires more time [30].

402 Advancing the understanding of uterine perfusion, Bollwein et al. (2002) [13] when evaluating  
403 pregnant animals, concluded that throughout pregnancy there is a strong increase of blood flow in the  
404 uterine arteries. However, they observed that the resistivity index decreased in the first 8 months of  
405 gestation and remained at a relatively constant level until the calf was born. It is known that during  
406 the diestro the blood flow velocity remains constant and are correlated to the plasma concentration  
407 estrogen and progesterone, indicating a moderate positive correlation Bollwein et al. (2016) [30].  
408 These results indicate that there are other factors involved in the regulation of blood flow [31].

409 In healthy cows the uterine blood flow decreased after the complete uterine involution.  
410 However, cows with uterine disease presents slow uterine involution, occurring between 45 and 65  
411 days postpartum. These results indicate an association between incomplete uterine involution and

412 regeneration of the uterine vascular layer in cows with puerperal disease. Changes in uterine perfusion  
413 are greatly pronounced during the first 4 days after delivery. Uterine puerperal diseases such as  
414 retention fetal attachments and metritis have a negative impact on uterine involution [17]. Thus,  
415 uterine blood flow is affected by puerperal uterine diseases. Cows with retained placenta have higher  
416 resistivity index than healthy cows. On the 8th day postpartum, cows with metritis had higher blood  
417 flow and decreased pulsatility in the arteries compared to healthy cows [17].

418 Evaluation of the uterine and ovarian vascularization helps to determine the best moment to  
419 perform artificial insemination [31]. The vascular perfusion of corpus luteum and uterus is greater  
420 during the first follicular wave compared to the second follicular wave of the estrous cycle [31]. The  
421 color Doppler mode identifies follicles in normal development and predicts the next ovulate. In this  
422 research, the ovarian evaluation showed that some cows with endometritis had no corpus luteum in  
423 both the right and left ovary. However, animals with right and left CL presented 61.54% and 52.94%  
424 vascularized, respectively. Color Doppler mode showed that cows with no vascularized left and right  
425 corpus luteum had endometritis, demonstrating that there is a interference in reproduction  
426 performance even in endometritic cows exhibiting normal estrous cycle.

427 Microbiological results showed the presence of *Bacillus* spp., *Trueperella pyogenes*,  
428 *Staphylococcus intermedius*, *Escherichia coli*, *Streptococcus* spp., *Proteus* spp., *Staphylococcus*  
429 *aureus*, *Enterobacteria* and *Serratia* spp. besides fungus and yeast. Santos, Gilbert and Bicalho  
430 (2011) [32] reported that *Escherichia coli*, *Streptococcus* spp., *Trueperella pyogenes* and  
431 *Fusobacterium necrophorum* are the main bacteria that commonly contaminate the uterine lumen  
432 after childbirth. These microorganisms were also associated with some uterine diseases. *Trueperella*  
433 *pyogenes* acts in synergisms with *Fusobacterium necrophorum*, *Bacteroides* spp., and *Prevotella* spp.  
434 [33]. Potter et al. (2010) [34] reported that *Trueperella pyogenes* is recognized as an important  
435 pathogen associated with endometritis due to its persistence in the contaminated uterus. Recently,  
436 Boer et al. (2015) [35] found that cows with any bacterial growth at 21 days postpartum, regardless  
437 of bacterial species, had a lower conception rate. Using the 16S rRNA sequencing, Machado et al.

438 (2012) [36] detected *Trueperella pyogenes* increased in cows with endometritis. Yeasts have been  
439 associated with chronic endometritis in women [40]. In the present research, yeasts were detected in  
440 22.5% of cows. The onset of *Trueperella pyogenes* was correlated with uterine inflammation seen by  
441 the colorimetric ultrasonographic method.

442 Although endometritis has a spontaneously healing condition, Dubuc et al. (2011) [7] found  
443 63% of spontaneous cure, while LeBlanc et al. (2002a) [5] described 77% self-healing. It still causes  
444 many economic and reproductive damages in the dairy industry. In order to reduce this problem, it is  
445 important to use new tools to improve the precision and the precocity in the diagnostic, upgrading the  
446 reproductive indices.

## 447 **5. Conclusions**

448 It is detected the relationship between the diameter of the cervix and the uterine horns with  
449 endometritis. This relationship was notorious when the presence of intrauterine fluid and intrauterine  
450 heterogeneous content was verified. Color Doppler showed the association between the  
451 vascularization of inflamed tissue and endometritis. However, performing spectral Doppler  
452 ultrasound showed no differences between healthy and unhealthy animals. The microbiological  
453 examination showed that *Trueperella pyogenesis* and *Escherichia coli* have an important role in the  
454 development of endometritis, corroborating other researches. Less invasive techniques with fast  
455 results such as Doppler ultrasonography can provide satisfactory answers regarding to the evolution  
456 of uterine alterations, improving reproductive rates.

457

458 **Acknowledgements and Funding:** Authors thank São Paulo Research Foundation (Process  
459 number 2014/02676-4)

460 **Declarations of Interest:** None

461

462

463

464 **REFERENCES**

465

466 [1] Radostits OM; Gay CC; Hinchcliff KW; Constable PD. Veterinary medicine: a textbook of disease  
467 of cattle, sheep, pigs, goats and horses. 9. Ed. Philadelphia: WB. Saunders, 2007.

468 [2] Bollwein H; Luttgenau J; Herzog K. Bovine luteal blood flow: Basic mechanism and clinical  
469 relevance. *Reprod, Feril, Dev.* V.25, n.1, p.71-79, 2013.

470 [3] Grohn YT; Rajala-Schults PJ. Epidemiology of reproductive performance in dairy cows. *Anim  
471 Reprod Sci*, 60-61:605-614, 2000.

472 [4] Leblanc S. Economics of improving reproductive performance in dairy herds. *WCDS advances in  
473 Dairy technology*. 19:201-214, 2007.

474 [5] Leblanc SJ; Duffield TF; Leslie KE; Bateman KG; Keefe GP; Walton JS; Johnson WH. Defining  
475 and diagnosing postpartum clinical endometritis and its impact on reproductive performance in dairy  
476 cows. *J. Dairy Sci*, 85(9):2223-2236, 2002.

477 [6] Gilbert RO; Shin ST; Guard CL; Erb HN; Frajblat M. Prevalence of endometritis and its effects  
478 on reproductive performance of dairy cows. *Theriogenology*. 64(9):1879-1888, 2005.

479 [7] Dubuc J; Duffield TF; Leslie KE; Walton JS; Leblanc SJ. Effects of postpartum uterine diseases  
480 on milk production and culling in dairy cows. *J. dairy Sci*. 94(3):1339-1346, 2011.

481 [8] Sheldon IM; Lewis GS; Leblanc S; Gilber RO. Defining postpartum uterine disease in cattle.  
482 *Theriogenology*. 65(8):1516-1530, 2006.

483 [9] Carvalho CF; Cjammass MC; Cerri GG. Princípios físicos do Doppler em ultra-sonografia. *Cienc  
484 Rural*. 38(3):872-879, 2008.

485 [10] Steer CV; Campbell S; Pampiglione JS; Kingsland CR; Mason BA; Collins WP. Transvaginal  
486 colour flow imaging of the uterine arteries during the ovarian and menstrual cycles. *Hum Reprod*.  
487 5(4):391-395, 1990.

488 [11] Steer CV; RTan SL; Mason BA; Campbell S. Midluteal-phase vaginal color Doppler assessment  
489 of uterine artery impedance in subfertile population. *Fertil Steril*. 61(1):53-58, 1994.

490 [12] Bollwein H; Mayer HH; Maierl J; Weber F; Baumgartner U; Stolla R. Transrectal color  
491 Dopplersonography of the A uterine in cyclic mares. *Theriogenology*. 49:1483-1488, 2000.

492 [13] Bollwein H; Baumgartner U; Stolla R. Transrectal Doppler sonography of uterine blood flow in  
493 cows during pregnancy. *Theriogenology*. 57(8):2053-2061, 2002.

494 [14] Kasimanickam R; Duffield TF; Foster RA; Gartley CJ; Leslie KE; Walton JS; Johnson WH. The  
495 effect of a single administration of cephalixin or cloprostenol on the reproductive performance of  
496 dairy cows with subclinical endometritis. *Theriogenology*. 63(3):818-830, 2005.

- 497 [15] Grunert E; Birgel EH; Vale WG. Patologia e clínica da reprodução dos animais mamíferos  
498 domésticos: ginecologia. São Paulo: Varela,2005. 551p.
- 499 [16] Meira JR EBS; Henriques LCS; Sá LRM; Gregory L. Comparison of ultrasonography and  
500 histopathology for diagnosis of endometritis in Holstein-Friesian cows. J Dairy Sci. 95(2):6969-6973,  
501 2012.
- 502 [17] Heppelmann M; Kruger L; Leidl HB. Science transrectal Doppler sonography of uterine blood  
503 flow during the first two weeks after parturition in Simmenthal heifers. J Vet Sci 14(3):323-327,  
504 2013.
- 505 [18] Descoteaux L; Gnemmi G; Colloton J. Ruminant and camelid reproductive ultrasonography.  
506 Ames:Blackwell Publishing, 2010.
- 507 [19]Ginter OJ. Ultrasonic imaging and animal reproduction: color-Doppler ultrasonography. Cross  
508 Plains, WI: equiservices publishing, 2007, v.4, 258p.
- 509 [20] Mello RC. Perdas reprodutivas em fêmeas bovinas. Agropecuária científica no semiárido.  
510 10(4):07-23, 2014.
- 511 [21] Ribeiro, BLM. Avaliação do útero bovino com endometrite utilizando a técnica de  
512 ultrassonografia Doppler. Dissertação de Mestrado, Universidade de São Paulo, Faculdade de  
513 Medicina Veterinária e Zootecnia 72 f., 2016.
- 514 [22] Madoz LV; Giuliadori MJ; Migliorisi AL; Jaureguiberry M; De la Sota RL. Endometrial  
515 cytology, biopsy and bacteriology for the diagnosis of subclinical endometritis in grazing dairy cows.  
516 J Dairy Sci. 97(1):195-201, 2014.
- 517 [23] Kasimanickam R; Duffield TF; Foster RA; Gartley CJ; Leslie KE; Walton JS; Johnson WH.  
518 Endometrial cytology and ultrasonography for the detection of subclinical endometritis in postpartum  
519 dairy cows. Theriogenology. 62(1-2): 09-23, 2004.
- 520 [24] Dubuc J; Duffield TF; Leslie KE; Walton JS; Leblanc SJ. Definitions and diagnosis of  
521 postpartum endometritis in dairy cows. J Dairy Sci. 93(11):5225-5233, 2010.
- 522 [25] Morrow DA; Roberts SJ; McEntee K; Gray HG. Postpartum ovarian activity and uterine  
523 involution in dairy cattle. J Am Vet Med Assoc. 149:1596-1609, 1966.
- 524 [26] Mateus, L; da Costa LL; Bernardo F; Silva JR. Influence of puerperal uterine infection on uterine  
525 involution and postpartum ovarian activity in dairy cows. Reprod Domest Anim. 37(1):31-35, 2002.
- 526 [27] Slama H.; Vaillancourt D; Goff AK. Pathophysiology of puerperal period: relationship between  
527 prostaglandin E2 (PGE<sub>2</sub>) and uterine involution in the cow. Theriogenology. 36(6):1071-1090,  
528 1991.
- 529 [28] Barlund, C S; Carruthers, T D; Waldner, C L; Palmer, CWA. Comparison of diagnostic  
530 techniques for postpartum endometritis in dairy cattle. Theriogenology, v. 69, n. 6, p. 714-723, 2008.
- 531 [29] Oral, H; Sozmen, M.; Serin, G.; Kaya, S. Comparison of the cytobrush technique, vaginoscopy  
532 and transrectal ultrasonography methods for the diagnosis of postpartum endometritis in cows. J

- 533 Anim Vet Adv, v. 8, n. 7, p. 1252-1255, 2009.
- 534 [30] Bollwein, H; Heppelmann, M; Johannes, L. Ultrasonographic Doppler use for female  
535 reproduction management. Vet Clin North Am Small Anim Pract, v. 32, n. 1, p. 149-164, 2016.
- 536 [31] Honnens, A; Voss, C; Herzog, K; Niemann, H; Rath, D; Bollwein, H. Uterine blood flow during  
537 the first 3 weeks of pregnancy in dairy cows. Theriogenology, v. 70, p. 1048–56, 2008.
- 538 [32] Santos TM, Gilbert RO, Bicalho RC. Metagenomic analysis of the uterine bacterial microbiota  
539 in healthy and metritic postpartum dairy cows. J Dairy Sci 94(1): 291–302, 2011.
- 540 [33] Bicalho ML, Machado VS, Oikonomou G, Gilbert RO, Bicalho RC. Association between  
541 virulence factors of *Escherichia coli*, *Fusobacterium necrophorum*, and *Arcanobacterium*  
542 *pyogenes* and uterine diseases of dairy cows. Vet Microbiol 57(1-2):125-31, 2011.
- 543 [34] Potter, TJ; Guitian, J; Fishwick, J; Gordon, PJ; Sheldon, IM. Risk factors for clinical endometritis  
544 in postpartum dairy cattle. Theriogenology, v.74, p.127–134, 2010.
- 545 [35] Boer, M; Buddle, BM; Heuer, C; Hussein, H; Zheng, T; Leblanc, SJ; McDougall, S. Associations  
546 between intrauterine bacterial infection, reproductive tract inflammation, and reproductive  
547 performance in pasture-based dairy cows. Theriogenology, v. 83, p. 1514-1515, 2015.
- 548 [36] Machado, VS; Oikonomou, G; Bicalho, MLS; Knauer, WA; Gilbert, R; Bicalho, R C  
549 Investigation of postpartum dairy cows' uterine microbial diversity using  
550 metagenomicpyrosequencing of the 16S rRNA gene. Vet Microbiol, v. 159, n. 3, p. 460-469, 2012.
- 551 [37] Cicinelli, E; De Ziegler, D; Nicoletti, R; Colafiglio, G; Saliani, N; Resta, L; Rizzi, D; De Vito,  
552 D. Chronic endometritis: correlation among hysteroscopic, histologic, and bacteriologic findings in a  
553 prospective trial with 2190 consecutive office hysteroscopies. Fertil Steril, v. 89, n. 3, p. 677-684,  
554 2008.
